# Supplementary figures and images for: Predicting direct protein interactions from affinity purification mass spectrometry data
Source: Springer Nature journal article supplement (doi:10.1186/1748-7188-5-34), 2010-10-29

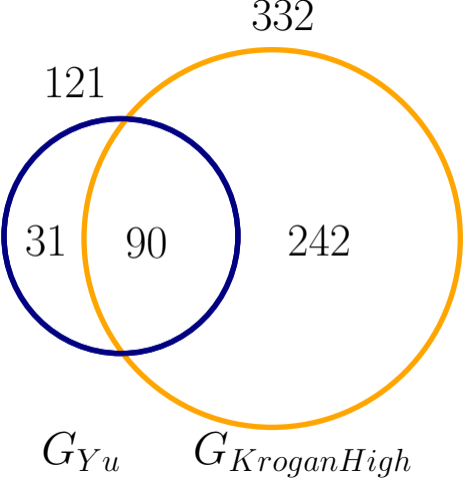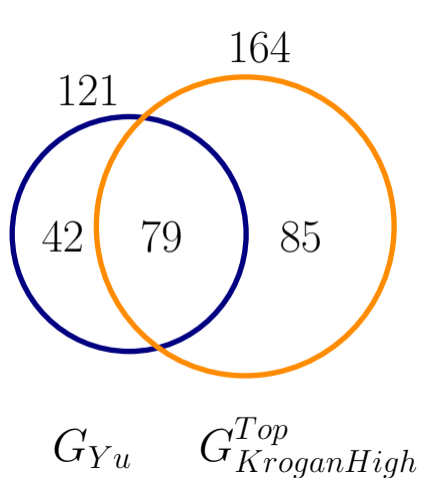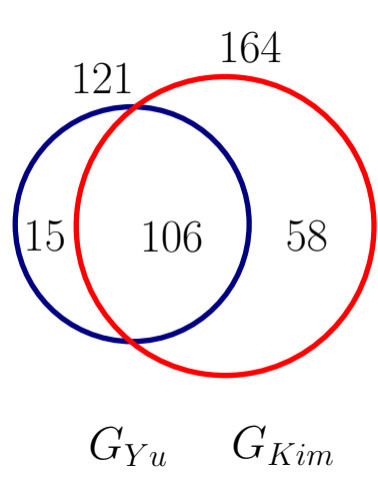

Supplement: 13015_2010_107_MOESM5_ESM.pdf [file 13015_2010_107_MOESM5_ESM.pdf]
